# Supplementary material
Source: ML conference proceedings conference paper supplement (https://openreview.net/forum?id=vLVEZr_66Ik)
Supplement: supplementary_material [file attachment]

---

# Supplementary Material

## Learning 3D Dense Correspondence via Canonical Point Autoencoder

---

Anonymous Author(s)

Affiliation

Address

email

### 1 A Computational Time and Model Size

#### 2 A.1 Training Details

3 We use the chair category as an example to illustrate the training pipeline. With 500 training samples,  
4 the training takes about 24 hours to converge, (4 hours for stage one ( $\alpha = 1$ ) and 20 hours for stage  
5 two ( $\alpha = 0$ )), on a single Tesla V100 GPU. Please see Algorithm 1 and Section 4.1 in the main paper  
6 for more details on the two stage training paradigm. *The source code will be released to public upon*  
7 *publication.*

---

**Algorithm 1 :** The training phase of our approach consists of two stages: (1) A pre-training stage trained with  $L_{ACD}$  and  $L_{rec}$  (2) A fine-tuning stage trained with  $L_{ACD}$ ,  $L_{rec}$ , and  $L_{cross}$

---

#### (A) STAGE-1: PRE-TRAINING

▷ 4 hours on Chair category

- 1: Randomly sub-sample  $k$  points from the input point cloud  $S_A$ ;
- 2: Initialize weight of the global feature encoder  $E(\cdot)$ , canonical mapping encoder  $\Phi(\cdot)$  and inverse mapping decoder  $\Psi(\cdot)$ ;
- 3: **for** epoch **in range**  $[0, T)$  **do**
- 4:   **foreach** iteration **do**
- 5:      $z_A \leftarrow E(S_A)$ ;
- 6:      $U_A \leftarrow \Phi([p, z_A])$ , where  $p \in S_A$ ;
- 7:      $\hat{S}_{A \rightarrow A} \leftarrow \Psi([q, z_A])$ , where  $q \in U_A$ ;
- 8:     Obtain loss  $L_{ACD}$  ( $\alpha = 1$ ) and  $L_{rec}$ ;
- 9:     Update weight;

---

#### (B) STAGE-2: FINE-TUNING

▷ 20 hours on Chair category

- 1: Generate randomly paired samples  $S_A$  and  $S_B$ ;
  - 2: **while** not converged **do**
  - 3:   **foreach** iteration **do**
  - 4:      $z_A \leftarrow E(S_A)$ ;
  - 5:      $U_A \leftarrow \Phi([p, z_A])$ , where  $p \in S_A$ ;
  - 6:      $\hat{S}_{A \rightarrow A} \leftarrow \Psi([q, z_A])$ , where  $q \in U_A$ ;
  - 7:     Obtain loss  $L_{ACD}$  ( $\alpha = 0$ ) and  $L_{rec}$ ;
  - 8:      $z_B \leftarrow E(S_B)$ ;
  - 9:      $U_B \leftarrow \Phi([p, z_B])$ , where  $p \in S_B$ ;
  - 10:     $\hat{S}_{A \rightarrow B} \leftarrow \Psi([q, z_B])$ , where  $q \in U_A$ ;
  - 11:     $\hat{S}_{B \rightarrow A} \leftarrow \Psi([q, z_A])$ , where  $q \in U_B$ ;
  - 12:    Obtain loss  $L_{cross}$ ;
  - 13:    Update weight;
-

## 8 A.2 Inference Details

9 Please see Fig 1 and Section 3.2 in the main  
 10 paper for more details on the inference pipeline.  
 11 Our proposed CPAE model contains 2.07M pa-  
 12 rameters which is  $2.5\times$  less than the 5.22M pa-  
 13 rameters in [1]. At inference time, the compu-  
 14 tational time for label transfer between a pair  
 15 of shapes (each with 2048 points) is 0.03 se-  
 16 cond including runtimes of the nearest neighbor  
 17 search for both shapes.

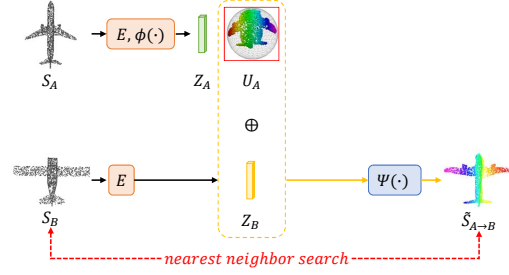

Figure 1: The inference flow of our approach.

## 18 B Application on Texture Transfer

19 Given a source 3D shape, we transfer texture  
 20 from the source shape to multiple target shapes using computed correspondences. Our method is able  
 21 to detect points that do not have correspondents in the source 3D shape (e.g., airplane without tail  
 22 wings or stabilizers).

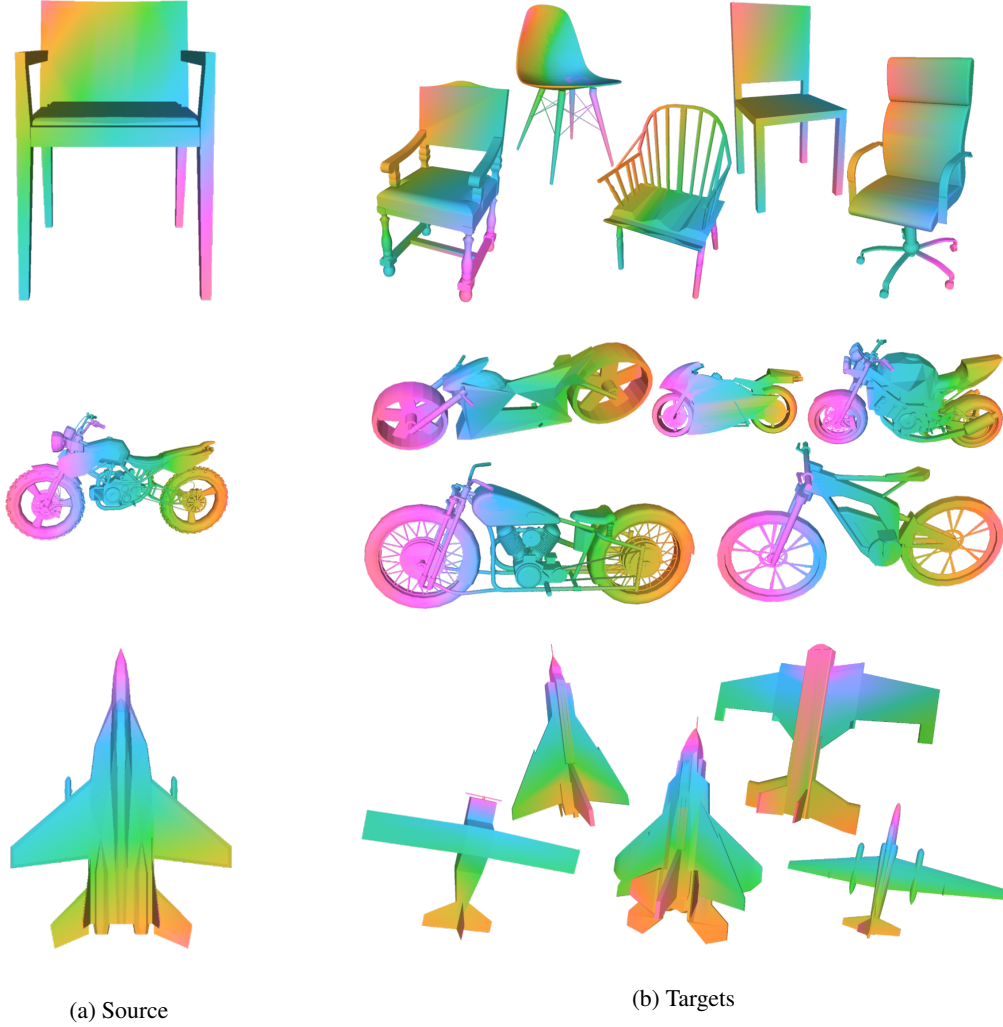

Figure 2: Applications on texture transfer.

## 23 C Qualitative Results of Instance-aware Primitives

24 In Figure 3, we demonstrate more examples of the instance-aware primitives as discussed in Section  
 25 3.1 in the main paper. Two observations can be made from this figure: a) The instance-aware  
 26 primitives produced by our canonical mapping are closely adhered to a canonical sphere. b) points of  
 27 the same semantic parts are mapped to nearby locations on the primitives, as shown by the colored  
 28 keypoints in Figure 3. These observations demonstrate that our model is able to learn correspondence  
 29 across different shapes in the same category.

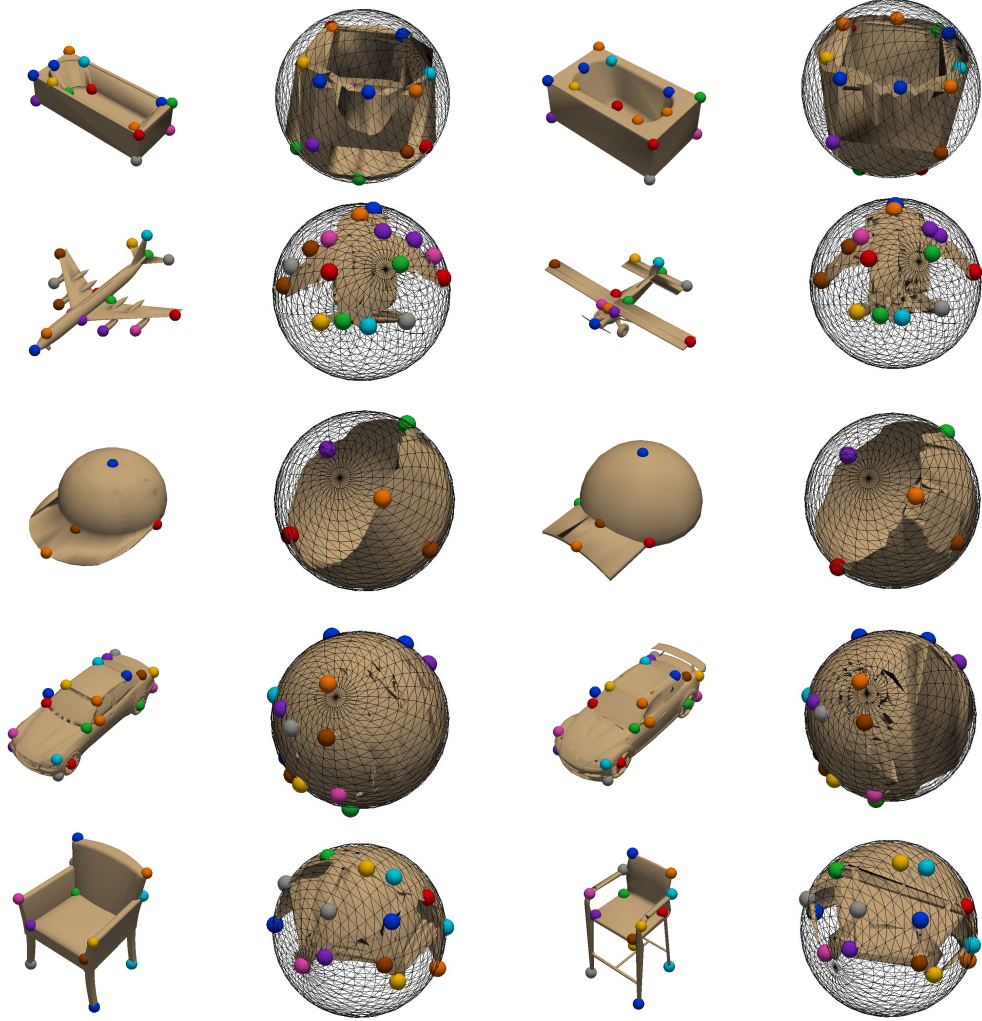

Figure 3: Instance-aware primitives on five different categories from the KeypointNet dataset [2]

## 30 D Qualitative Results of Part Label Transfer

31 In Figure 4, we show more qualitative results of the part label transfer task. Thanks to the dense  
 32 correspondences learned by our model, we can transfer part labels for small parts (e.g. the handle  
 33 of mugs or the tail wings of airplanes) and handle large intra-class variations (e.g. different legs of  
 34 chairs in row three in Figure 4).

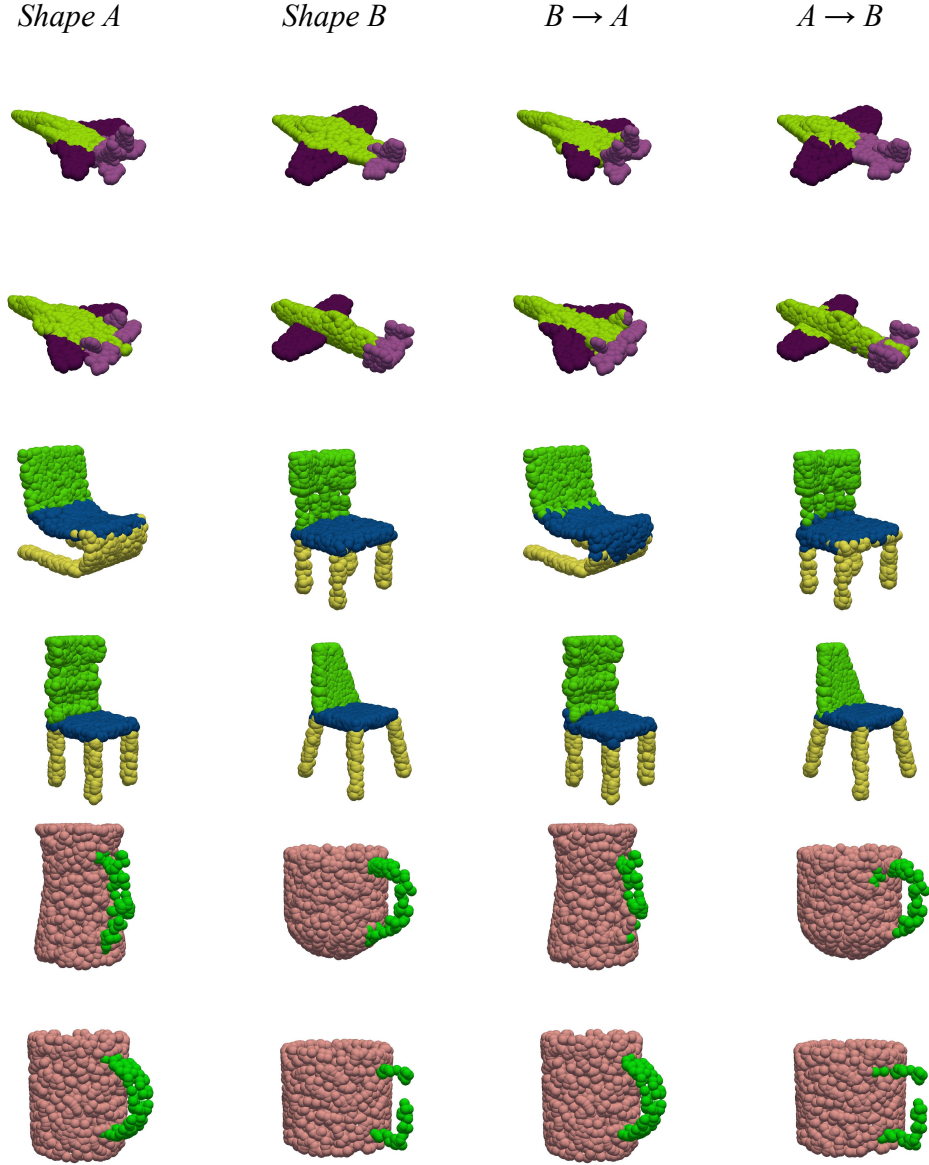

Figure 4: Part label transfer results.  $B \rightarrow A$  refers to transferring shape B’s label to shape A.

## 35 E Correspondence Confidence Heatmap Visualization

36 We use the confidence score (mentioned in main paper Section 3.4) to draw heatmaps for multiple  
 37 target shapes in the same categories. As shown in Fig. 5, the predicted confidence heat maps  
 38 successfully indicate the intra-class variations and capture uncertainty in correspondence prediction.  
 39 For instance, low confidences can be found in mugs with different handles, knives with different  
 40 blades, guitars with different bodies, etc.

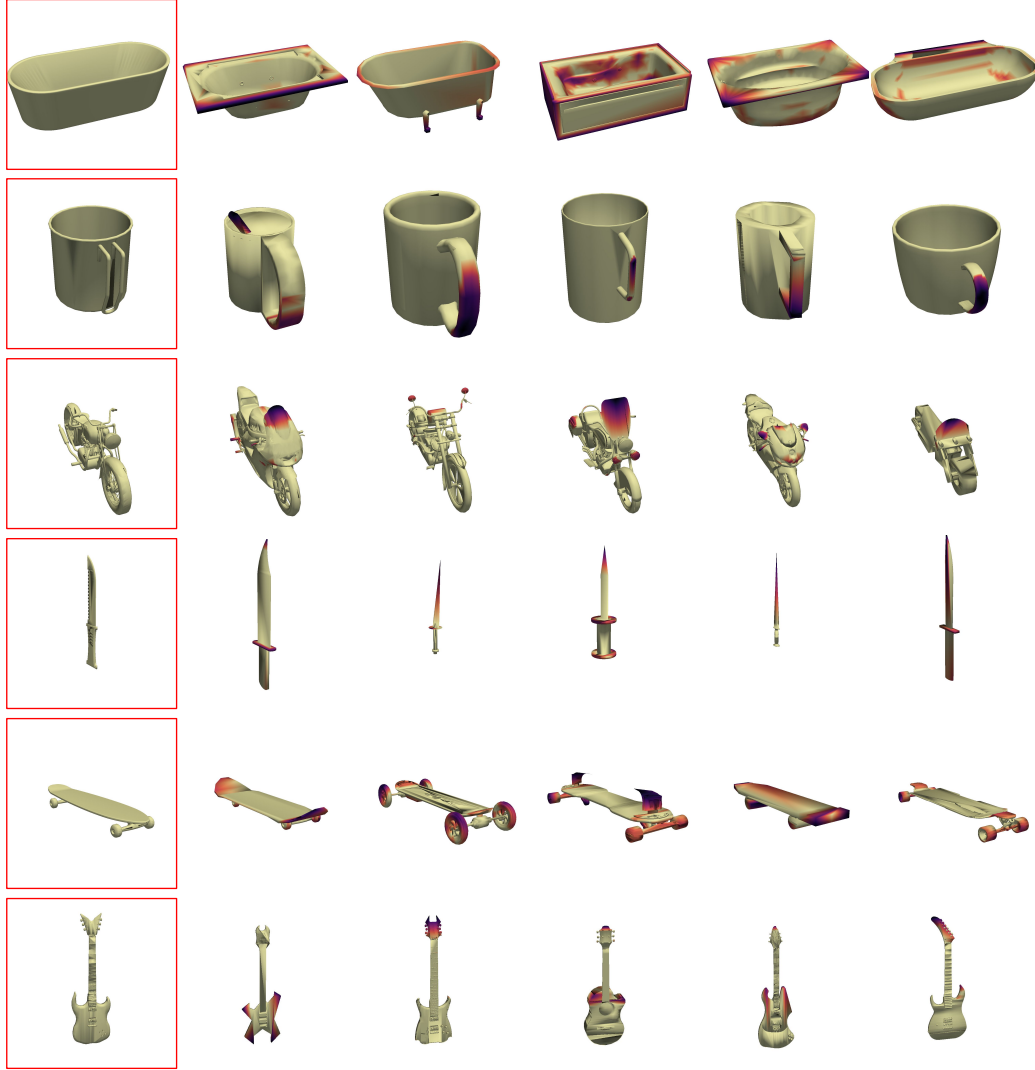

Figure 5: Correspondence confidence heatmaps. Red boxes indicate source shapes. The darker the heatmap, the lower the confidence.

## 41 F Limitation

42 There are two main limitations for our approach: (a) we encode the shape information of a point  
 43 cloud in a global vector – i.e., fine details like corners and edges may be blurred after reconstruction.  
 44 (b) We found the correspondences predicted near holes maybe wrong, possibly due to the sparsity of  
 45 points in the point cloud and the nature of Chamfer and Earth Mover’s distance matrices. We leave  
 46 these limitations for future works.

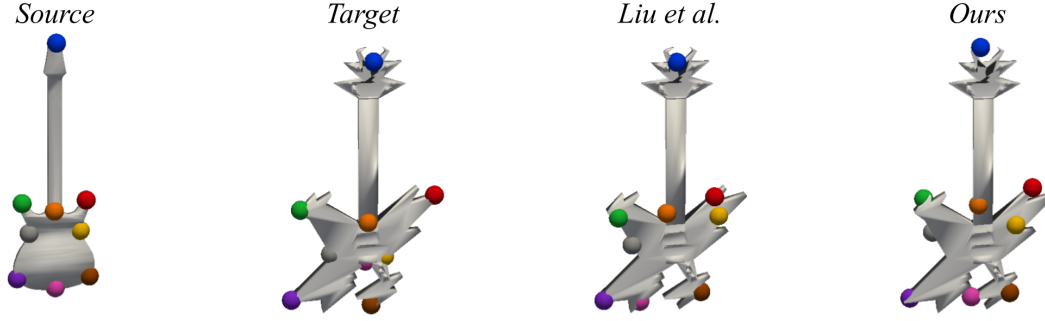

Figure 6: Failure cases.

## References

- 47 [1] Feng Liu and Xiaoming Liu. Learning implicit functions for topology-varying dense 3d shape  
48 correspondence. In *NeurIPS*, 2020. 2
- 50 [2] Yang You, Yujing Lou, Chengkun Li, Zhoujun Cheng, Liangwei Li, Lizhuang Ma, Cewu Lu,  
51 and Weiming Wang. Keypointnet: A large-scale 3d keypoint dataset aggregated from numerous  
52 human annotations. In *CVPR*, 2020. 3
